# Supplementary material
Source: publisher site journal article supplement (https://www.dovepress.com/article/254437)

**Supplemental Materials for the study:**

**The Summit Score Stratifies Mortality and Morbidity in Chronic Obstructive Pulmonary Disease**

Benjamin D. Horne, PhD, MStat, MPH*†; Matthew J. Hegewald, MD‡; Courtney C. Crim, MD§; Susan Rea, PhD¶; Tami L. Bair, BS*; Denitza P. Blagev, MD‡

*Intermountain Medical Center Heart Institute, Salt Lake City, UT; †Division of Cardiovascular Medicine, Department of Medicine, Stanford University, Stanford, CA; ‡Division of Pulmonary Medicine, Department of Internal Medicine, Intermountain Medical Center, Salt Lake City, UT; §Research & Development, GlaxoSmithKline, Research Triangle Park, NC; ¶Care Transformation, Intermountain Healthcare, Salt Lake City, UT.

**Supplemental Text**

**Supplemental Methods**

The second Intermountain outpatient population (N=8,551) included patients ages 40-80 years who did not have the cardiovascular risk factors or diagnoses required for the primary Intermountain validation population. The third Intermountain validation population was composed of all inpatients (N=26,170) among whom were n=24,928 (95.3%) patients ≥40 years of age and n=1,242 (4.7%) ages 18-39 years who were admitted to one of the 22 hospitals with their first COPD encounter between January 2009 and December 2015. The primary discharge diagnosis were the ICD-9 codes listed for outpatients (490, 491, 492, 493, 494, or 496), except for 495. Inpatients with a primary asthma code were required to have a secondary COPD code. These inpatients were followed through January 2017 for mortality and other outcomes.

Secondary endpoints that were tested for association with the Summit Score in the four validation populations included the first moderate to severe COPD exacerbation and the first cardiovascular event. These analyses used Cox regression with time to event or censor. For the SUMMIT trial, these events were defined as previously,(5,20) including that a cardiovascular event was the composite of MI, unstable angina, stroke, transient ischemic attack, or cardiovascular mortality. In the Intermountain populations, a cardiovascular event was the composite of MI, unstable angina, or stroke (transient ischemic attack data and the cause of death were not available; and, patients who died were censored at the time of death). In the SUMMIT validation subjects, associations of the Summit Score with changes in FEV1, FVC, and the FEV1/FVC ratio were tested by analysis of variance.

Among the Intermountain populations, additional cardiovascular outcomes were available that empowered the evaluation of associations of the Summit Score with the endpoints of subsequent need for coronary revascularization, incident HF among patients free of HF at baseline, and incident arrhythmias among those free of arrhythmias at baseline. These analyses were performed using Cox regression among each outpatient population separately and among the inpatients.

A second score, the Summit Lab Score, was derived utilizing the aforementioned variables and methods, but also entering the CBC factors, the BMP parameters, and high-sensitivity C-reactive protein (hsCRP). The CBC and BMP variables included hematocrit, white blood cell count, platelet count, mean corpuscular volume (MCV), mean corpuscular hemoglobin concentration, red cell distribution width (RDW), mean platelet volume, sodium, potassium, calcium, bicarbonate, glucose, and creatinine. Other CBC and BMP components—red blood cell count, hemoglobin, mean corpuscular hemoglobin, chloride, and blood urea nitrogen—were excluded from models due to multicollinearity. Only 10.6% of SUMMIT subjects had CBC and BMP laboratory data available and 10.1% had hsCRP, thus the majority of subjects were coded for missing data in these variables, allowing those subjects to be included in the Cox modeling for the Summit Lab Score.

The previously-derived IMRS (9) and pIMRS (10) were evaluated for validation using published risk weightings for the CBC factors, BMP parameters, age, and (for pIMRS) FVC and BMI. While IMRS was developed in a hospitalized population,(9) pIMRS was developed in a spirometry population of individuals with suspected pulmonary disease who did not necessarily receive a COPD diagnosis.(10) The association of these scores with all-cause mortality was evaluated in SUMMIT trial subjects using Cox regression and Kaplan-Meier methods. CBC or BMP panel results were available for n=1,810 SUMMIT subjects, but n=65 were excluded due to missing half or more of the components of one or both laboratory panels (thus for evaluation of IMRS, n=1,745) and an additional n=77 were excluded due to missing data in the pIMRS evaluation (n=1,668). Because both IMRS and pIMRS utilize sex-specific weightings for each component, categorization by previously-derived thresholds (9) or by quartiles was performed within each sex prior to analysis of the combined population.

**Supplemental Results**

Among the Intermountain non-cardiovascular outpatient validation population, the c-statistic for mortality of the Summit Score was c=0.708. For the Intermountain inpatient validation population, results were similarly strong (c=0.733).

Secondary endpoints of the first moderate or severe COPD exacerbation and the first cardiovascular event are provided in Supplemental Table S4 for the Summit Score quartiles in each of the four validation populations. Importantly, longitudinal changes in FEV1 and the FEV1/FVC ratio, but not FVC, were predicted by the Summit Score (Supplemental Table S5), where the baseline values in the Summit Score quartiles 1, 2, 3, and 4 were 1829±455 mL, 1699±423 mL, 1641±398 mL, and 1555±368 mL (p<0.001) for FEV1, respectively, 3047±788, 2911±767, 2875±730, and 2800±685 (p<0.001) for FVC, respectively, and 60.8±8.9%, 59.2±8.9%, 58.0±9.4%, and 56.5±9.8% (p<0.001) for the FEV1/FVC ratio, respectively.

Other secondary cardiovascular outcomes that were not available in the SUMMIT trial data but that could be evaluated in the Intermountain populations included coronary revascularization, incident HF, and incident cardiac arrhythmia. The Summit Score was associated with first revascularization in Intermountain cardiovascular risk outpatients (quartile 4 vs. 1: HR=1.27, CI=1.004, 1.60, p=0.046), non-cardiovascular risk outpatients (quartile 4 vs. 1: HR=2.90, CI=1.67, 5.02, p<0.001), and inpatients (quartile 4 vs. 1: HR=3.04, CI=2.58, 3.58, p<0.001). In outpatients with cardiovascular risks, n=6,335 had no history of HF and quartile 4 vs. 1 had HR=2.66 (CI=1.95, 3.63, p<0.001), while outpatients without cardiovascular risks had HR=4.48 (CI=2.93, 6.85, p<0.001) for quartile 4 vs. 1 in n=7,992 initially HF-free patients. In the inpatients, n=19,956 had no HF history and quartile 4 vs. 1 had HR=3.58 (CI=3.22, 3.98, p<0.001). Among Intermountain patients free from arrhythmias at baseline, COPD outpatients with cardiovascular risks (n=7,233) had risk of first arrhythmia diagnosis in quartile 4 vs. 1 of HR=2.66 (CI=2.31, 3.07, p<0.001), outpatients without cardiovascular risks (n=8,121) had arrhythmia risk in quartile 4 vs. 1 of HR=3.19 (CI=2.61, 3.89, p<0.001), and COPD inpatients (n=20,271) had arrhythmia risk in quartile 4 vs. 1 of HR=3.53 (CI=3.23, 3.87, p<0.001).

Previously, IMRS thresholds for high-, moderate-, and low-risk were derived in an Intermountain population hospitalized for any diagnosis,(9) but using these thresholds in the SUMMIT trial population (only N=1,745 subjects had CBC and BMP laboratory results available, and 101 deaths occurred) demonstrated that the majority of the population was in the IMRS moderate-risk group (n=1,303), with just n=357 in the low-risk and n=85 in the high-risk groups. Using those thresholds, IMRS was validated as a predictor of mortality (log-rank p-trend<0.001) in the SUMMIT population, with mortality of 14.1% among high-risk (12 deaths), 5.9% among moderate-risk (77 deaths), and 3.4% among low-risk subjects (12 deaths). In Cox regression, the high-risk (HR=4.69, CI=2.11, 10.45, p<0.001) and moderate-risk IMRS groups (HR=1.72, CI=0.93, 3.16, p=0.08) had elevated mortality risk compared with the low-risk category. When IMRS was divided into *ad hoc* quartiles of similar sample size, Kaplan-Meier analysis found a significant trend (log-rank p-trend=0.022, Supplemental Figure S4A) and Cox regression showed that IMRS quartiles 4, 3, and 2 (compared with quartile 1) had HR=2.22 (CI=1.13, 4.37; p=0.021), HR=1.86 (CI=0.96, 3.63; p=0.07), and HR=1.68 (CI=0.86, 3.29; p=0.13), respectively. Evaluation also validated pIMRS as a predictor of mortality in the SUMMIT population (log-rank p-trend=0.037, Supplemental Figure S4B). In Cox regression, pIMRS quartiles 4, 3, and 2 had HR=1.59 (CI=0.90, 2.82, p=0.11), HR=1.64 (CI=0.93, 2.91, p=0.09), and HR=0.95 (CI=0.53, 1.72, p=0.87), respectively, compared with quartile 1.

Derivation of the Summit Lab Score utilized each of the factors that were significant predictors of mortality in the Summit Score, but further considered each lab value within the CBC and BMP, along with hsCRP as potential predictors. MCV and RDW were the only significant additional predictors of mortality that were included in the Summit Lab Score. Because 89.4% of SUMMIT subjects did not have laboratory data available, they were coded as missing the lab factors. Adding MCV and RDW to the Cox regression models resulted in the Summit Lab Score, which was not a stronger predictor of mortality than the Summit Score (see Supplemental Table S6 and Supplemental Figure S5). Values of the Summit Lab Score were low-risk when less than 22, moderate risk for 22-29, and high risk for 30 or greater.

**Supplemental Discussion**

In developing the Summit Lab Score, the general health parameters MCV and RDW were both associated with mortality as with IMRS,(9) although the lab score was not substantially more powerful than the primary Summit score. This may have been in part due to the substantial missing laboratory data. These laboratory parameters have been found to be associated with mortality and other outcomes in general populations (9,S1) and based on specific diagnoses including COPD.(S1) These results for MCV and RDW, lab tests strongly associated with systemic inflammation,(S2) provides further evidence that systemic inflammation connects COPD and cardiovascular disease. These laboratory factors and common general laboratory elements in the CBC and BMP deserve additional attention in COPD risk prediction.

**Supplemental Use Cases**

A therapeutic effect score like the Summit Score could be used to filter patients by who will or will not benefit from enhanced evaluation and treatment for preventing major adverse health events. The following provides two examples of how the Summit Score may be used in clinical practice to guide clinician attention to patients with the greatest need for personalization of care. This use first requires the computation of the Summit Score. A computerized calculator that can be used to compute the Summit Score for research purposes is available online (see: <https://intermountainhealthcare.org/riskscores> or <https://intermountainhealthcare.org/imrs_summit/>). Once the score is calculated, either as the Summit Score or Summit Lab Score, comparison of the patient’s score to the risk for someone in the same age decade may be performed. Both risk scores for patients aged <50 years have the lower limit of 0, while the lower limits are 6, 7, 9, and 11 for patients aged 50-59, 60-69, 70-79, and ≥80 years, respectively. As per Table 2 and Supplemental Figure S3, the Summit Score can range from 0-32. Per Supplemental Table S6, the Summit Lab Score can range from 0-43.

For example, a female patient is 61 years of age and a smoker with a 33.75 pack-year history with prescriptions for a short-acting anticholinergic, an inhaled corticosteroid, an anti-thrombotic agent, and a long-acting beta-2 agonist. She has unknown history of MI and HF, but is diagnosed with type 2 diabetes and has no history of hospitalization for COPD exacerbation. Her heart rate is 72 beats per minute, BMI is 25.34 kg/m2, and SBP is 118 mmHg, and FEV1 is 1.60 L. Based on this information, her Summit Score is 22; adding in that her MCV is 101 fL and RDW is 16.6%, her Summit Lab Score is 33. With a Summit Score ≥20 (or Summit Lab Score ≥30), this patient is in the high risk range and additional measures beyond standard COPD care should be considered. Such personalizations of care may include the dose up-titration of currently prescribed medications, the prescription of additional medications under a more aggressive approach based on symptoms or risk markers to treat what would otherwise be considered borderline pulmonary, cardiovascular, and diabetes health concerns (especially medications that will extend life span), and consideration of performing additional cardiovascular diagnostic testing (eg, treadmill test or cardiac imaging) to rule out coronary artery disease. Further, enhanced education may be provided to go over COPD and diabetes self-care by an advanced practice nurse with extra time for asking questions and resolving concerns, the patient could be evaluated for possible prescription of home care, a care manager follow up call within a short time frame after the patient visit (eg, within 3 days), and scheduling the patient for a follow-up outpatient visit in a shorter than usual time frame could be done.

In contrast, a second female patient who is aged 69 years and smokes (30.75 pack-year history), but is only on a short-acting anticholinergic would be treated using standard COPD and cardiovascular care approaches with a potential reduction in time spent to evaluate the patient due to having the risk score. This patient has a history of MI and no prior hospitalizations for COPD exacerbation. Her heart rate is 68 beats per minute, BMI is 33.14 kg/m2, SBP is 126 mmHg, and FEV1 is 1.13 L. These measurements compute to a Summit Score of 12, which is in the low risk category (ie, scores <13) and suggests that additional care beyond the already-prescribed modalities is unlikely to provide substantial extension of the lifespan of this individual. Further, the benefits of additional medications or higher doses may be too low compared to the added risks that such changes may expose them to (eg, enhanced side-effects, complications for medication adherence), while the possible benefits of more frequent follow up or time spent on expanded educational sessions may reduce the time that staff members have to devote energy to precision care of people with much higher risk who would benefit more. If the Summit Score is within a moderate risk range (ie, scores of 13-19, or 22-29 for the Summit Lab Score), use of a few but not all of the more intensive or aggressive approaches may be warranted.

**Supplemental References**

S1. Horne BD, Muhlestein JB, Bennett ST, Muhlestein JB, Jensen KR, Marshall D, Bair TL, May HT, Carlquist JF, Hegewald M, Knight S, Le VT, Bunch TJ, Lappé DL, Anderson JL, Knowlton KU. Extreme erythrocyte macrocytic and microcytic percentages are highly predictive of morbidity and mortality. *JCI Insight* 2018;3(14):e120183.

S2. Lippi G, Targher G, Montagnana M, Salvagno GL, Zoppini G, Guidi GC. Relation between red blood cell distribution width and inflammatory biomarkers in a large cohort of unselected outpatients. *Arch Pathol Lab Med* 2009;133:628–632.

**Supplemental Table S1**. The association of quartiles of the Summit Risk Score with all-cause mortality in the lower-risk Intermountain outpatients who were free of cardiovascular risks and the higher-risk Intermountain inpatients. As per Table 1, length of follow-up for mortality differed between populations.

**Summit Score Category Mortality Hazard Ratio (95% CI) p-value Sample Size**

*Intermountain COPD Outpatients with no Cardiovascular Risks (External Validation 2) (N=8,551)*

Quartile: 1 (Score: 0-6) 3.9% 1.0 (referent) ------ n=1,972

2 (Score: 7-9) 8.5% 2.21 (1.70, 2.87) <0.001 n=2,526

3 (Score: 10-11) 12.3% 3.31 (2.55, 4.30) <0.001 n=1,795

4 (Score: 12-22) 25.0% 7.12 (5.60, 9.05) <0.001 n=2,258

*Intermountain COPD Inpatients (External Validation 3) (N=26,170)*

Quartile: 1 (Score: 0-10) 15.2% 1.0 (referent) ------ n=7,036

2 (Score: 11-13) 27.7% 2.06 (1.91, 2.22) <0.001 n=6,481

3 (Score: 14-16) 43.0% 3.52 (3.28, 3.78) <0.001 n=6,186

4 (Score: 17-30) 63.6% 6.02 (5.63, 6.44) <0.001 n=6,467

**Supplemental Table S2**. The association of the Summit Score with all-cause mortality in the three Intermountain validation populations utilizing risk score categories defined by the Summit Score thresholds from the SUMMIT validation population’s quartiles (ie, the thresholds used for the SUMMIT validation population, as shown in Table 2).

**Summit Score Category Mortality Hazard Ratio (95% CI) p-value Sample Size**

*Intermountain COPD Outpatients with Cardiovascular Risks (Validation Two) (N=9,251)*

Category: Score: 0-12 14.4% 1.0 (referent) ------ n=5,128

Score: 13-14 32.6% 2.44 (2.19, 2.72) <0.001 n=1,806

Score: 15-17 44.5% 3.68 (3.32, 4.07) <0.001 n=1,622

Score: 18-26 65.9% 6.50 (5.78, 7.30) <0.001 n=695

*Intermountain COPD Outpatients without Cardiovascular Risks (Validation Three) (N=8,551)*

Category: Score: 0-12 9.3% 1.0 (referent) ------ n=7,049

Score: 13-14 23.4% 2.66 (2.27, 3.11) <0.001 n=871

Score: 15-17 31.5% 3.82 (3.22, 4.53) <0.001 n=527

Score: 18-26 49.0% 6.62 (4.98, 8.80) <0.001 n=104

*Intermountain COPD Inpatients (Validation Four) (N=26,170)*

Quartile: 1 (Score: 0-12) 19.0% 1.0 (referent) ------ n=11,015

2 (Score: 13-14) 34.2% 2.04 (1.91, 2.18) <0.001 n=4,603

3 (Score: 15-17) 47.7% 3.08 (2.91, 3.26) <0.001 n=5,760

4 (Score: 18-30) 67.4% 5.09 (4.81, 5.38) <0.001 n=4,792

**Supplemental Table S3**. Predictive values and accuracy for the Summit Score (comparing quartile 4 vs. quartiles 1-3) in association with mortality in each study population. See Table 2 for Summit Score quartile thresholds. Note that these results are impacted by the prevalence of the outcome (mortality), with positive and negative predictive values more affected than the sensitivity or specificity. Specific levels of sensitivity and specificity can be chosen by selecting the value of a risk score at which a threshold of elevated vs. not elevated is made (eg, here the threshold was the value separating Summit Score quartiles 1-3 from quartile 4). Most reports of prognostic risk scores do not report positive or negative predictive values, but these results are typical. These results reveal that the Summit Score is useful as a tool for initial evaluation and decision making, with further personalization of care needed for people with high-risk scores, perhaps by using the risk score as a time-saving tool for guiding clinician attention as was recently done for other scores among heart failure patients.(30)

**Positive Negative**

**Predictive Predictive**

**Population Sensitivity Specificity Value Value Accuracy**

SUMMIT trial subjects

Derivation 43.5% 78.5% 12.3% 96.4% 76.2%

Validation 40.3% 78.9% 11.0% 96.5% 76.5%

Intermountain Validations

Outpatients with

Cardiovascular

Risks 47.1% 83.1% 50.9% 87.1% 73.4%

Outpatients without

Cardiovascular

Risks 52.4% 77.3% 25.0% 93.5% 74.2%

Inpatients 42.7% 85.8% 63.6% 78.8% 69.9%

**Supplemental Table S4**. Hazard ratios and 95% confidence intervals for the association of quartiles of the Summit Score with secondary study outcomes in the four validation populations.

**Summit Score Category Events Hazard Ratio (95% CI) p-value Sample Size**

*First Moderate/Severe COPD Exacerbation*

*SUMMIT Trial Internal Validation (N=8,304)*

Quartile: 1 (Score: 1-12) 25.1% 1.0 (referent) ------ n=1,977

2 (Score: 13-14) 27.6% 1.15 (1.01, 1.30) 0.033 n=1,813

3 (Score: 15-17) 28.7% 1.23 (1.10, 1.38) <0.001 n=2,664

4 (Score: 18-32) 33.5% 1.52 (1.35, 1.71) <0.001 n=1,850

*Intermountain COPD Outpatients with Cardiovascular Risks (Validation Two) (N=9,251)*

Quartile: 1 (Score: 0-9) 28.2% 1.0 (referent) ------ n=2,207

2 (Score: 10-11) 33.6% 1.28 (1.15, 1.43) <0.001 n=1,932

3 (Score: 12-14) 39.9% 1.63 (1.48, 1.80) <0.001 n=2,795

4 (Score: 15-26) 40.8% 2.08 (1.88, 2.30) <0.001 n=2,317

*Intermountain COPD Outpatients without Cardiovascular Risks (Validation Three) (N=8,551)*

Quartile: 1 (Score: 0-6) 16.2% 1.0 (referent) ------ n=1,972

2 (Score: 7-9) 22.8% 1.46 (1.27, 1.67) <0.001 n=2,526

3 (Score: 10-11) 26.4% 1.81 (1.57, 2.08) <0.001 n=1,795

4 (Score: 12-22) 33.9% 2.58 (2.26, 2.94) <0.001 n=2,258

*Intermountain COPD Inpatients (Validation Four) (N=26,170)*

Quartile: 1 (Score: 0-10) 40.3% 1.0 (referent) ------ n=7,036

2 (Score: 11-13) 44.7% 1.18 (1.12, 1.24) <0.001 n=6,481

3 (Score: 14-16) 47.2% 1.42 (1.35, 1.50) <0.001 n=6,186

4 (Score: 17-30) 46.6% 1.74 (1.66, 1.83) <0.001 n=6,467

*First Cardiovascular Event**

*SUMMIT Trial Internal Validation (N=8,304)*

Quartile: 1 (Score: 1-12) 2.3% 1.0 (referent) ------ n=1,977

2 (Score: 13-14) 3.0% 1.33 (0.90, 1.97) 0.16 n=1,813

3 (Score: 15-17) 4.5% 2.06 (1.47, 2.89) <0.001 n=2,664

4 (Score: 18-32) 5.7% 2.64 (1.87, 3.74) <0.001 n=1,850

*Intermountain COPD Outpatients with Cardiovascular Risks (Validation Two) (N=9,251)*

Quartile: 1 (Score: 0-9) 5.4% 1.0 (referent) ------ n=2,207

2 (Score: 10-11) 8.1% 1.55 (1.22, 1.96) <0.001 n=1,932

3 (Score: 12-14) 9.7% 1.95 (1.57, 2.42) <0.001 n=2,795

4 (Score: 15-26) 11.0% 2.65 (2.14, 3.30) <0.001 n=2,317

*Intermountain COPD Outpatients without Cardiovascular Risks (Validation Three) (N=8,551)*

Quartile: 1 (Score: 0-6) 1.6% 1.0 (referent) ------ n=1,972

2 (Score: 7-9) 2.7% 1.66 (1.09, 2.53) 0.018 n=2,526

3 (Score: 10-11) 3.8% 2.50 (1.64, 3.80) <0.001 n=1,795

4 (Score: 12-22) 4.1% 2.84 (1.90, 4.25) <0.001 n=2,258

*Intermountain COPD Inpatients (Validation Four) (N=26,170)*

Quartile: 1 (Score: 0-10) 4.1% 1.0 (referent) ------ n=7,036

2 (Score: 11-13) 7.0% 2.04 (1.76, 2.37) <0.001 n=6,481

3 (Score: 14-16) 8.8% 2.91 (2.52, 3.35) <0.001 n=6,186

4 (Score: 17-30) 10.5% 4.13 (3.60, 4.75) <0.001 n=6,467

*In the SUMMIT trial, a cardiovascular event was defined as MI, unstable angina, stroke, transient ischemic attack, or cardiovascular mortality; however, in the Intermountain populations, a cardiovascular event was myocardial infarction, unstable angina, or stroke (transient ischemic attack and cause of death data were not available).

**Supplemental Table S5**. Secondary analysis of the association of the Summit Scorewith changes in the FEV1, FVC, and the FEV1/FVC ratio in the SUMMIT validation population.

**Mean (±SD) Change in FEV1, FVC, and FEV1/FVC from Baseline to:**

**Spirometry Parameter 3 Months 6 Months 9 Months 12 Months**

*Change in FEV1 (mL)*

Summit Score, Quartile 1 41.3±284 41.5±296 33.5±310 33.5±316

Quartile 2 33.0±246 33.3±265 26.2±270 16.6±279

Quartile 3 27.1±244 33.2±259 25.7±268 13.8±279

Quartile 4 21.7±238* 16.3±251* 10.0±252* -1.9±259†

*Change in FVC (mL)*

Summit Score, Quartile 1 8.8±413 -12.9±429 -23.2±463 -19.6±457

Quartile 2 -4.8±375 -15.2±399 -17.4±414 -34.2±431

Quartile 3 -9.8±377 -6.4±412 -16.8±420 -34.6±431

Quartile 4 -13.7±393 -25.2±432 -24.5±429 -37.1±429

*Change in FEV1/FVC Ratio*

Summit Score, Quartile 1 0.99±7.24 1.42±7.83 1.35±8.01 1.24±8.23

Quartile 2 1.11±6.47 1.49±6.84 1.20±7.07 1.28±7.31

Quartile 3 0.97±6.40 1.09±6.84 1.06±7.08 0.94±7.32

Quartile 4 1.09±7.79 0.99±7.18* 0.71±7.36* 0.58±7.23‡

Analysis of a trend across the Summit Score quartiles: *p-trend<0.05 (but ≥0.01); †p-trend<0.001; ‡p-trend<0.01 (but ≥0.001).

**Supplemental Table S6**. Secondary analysis: The association of the Summit Lab Score, a second risk score adding MCV and RDW to the Summit Score, with all-cause mortality in the validation populations.

**Summit Lab Score Category Mortality Hazard Ratio (95% CI) p-value Sample Size**

*SUMMIT Trial Internal Validation (N=8,304)*

Quartile: 1 (Score: 1-22) 3.8% 1.0 (referent) ------ n=2,289

2 (Score: 23-24) 4.1% 1.17 (0.84, 1.62) 0.35 n=1,555

3 (Score: 25-27) 5.5% 1.60 (1.21, 2.10) <0.001 n=2,380

4 (Score: 28-43) 10.9% 3.31 (2.58, 4.25) <0.001 n=2,080

*Intermountain COPD Outpatients with Cardiovascular Risks (Validation Two) (N=9,251)*

Quartile: 1 (Score: 0-9) 8.3% 1.0 (referent) ------ n=1,994

2 (Score: 10-13) 19.3% 2.40 (2.01, 2.87) <0.001 n=2,513

3 (Score: 14-18) 30.2% 4.01 (3.39, 4.75) <0.001 n=2,489

4 (Score: 19-37) 49.0% 7.51 (6.38, 8.85) <0.001 n=2,255

*Intermountain COPD Outpatients without Cardiovascular Risks (Validation Three) (N=8,551)*

Quartile: 1 (Score: 0-6) 3.4% 1.0 (referent) ------ n=1,830

2 (Score: 7-9) 8.3% 2.43 (1.83, 3.24) <0.001 n=2,300

3 (Score: 10-13) 14.9% 4.53 (3.45, 5.94) <0.001 n=2,253

4 (Score: 14-32) 22.6% 7.20 (5.53, 9.38) <0.001 n=2,168

*Intermountain COPD Inpatients (Validation Four) (N=26,170)*

Quartile: 1 (Score: 0-10) 11.7% 1.0 (referent) ------ n=6,155

2 (Score: 11-15) 28.5% 2.77 (2.55, 3.02) <0.001 n=7,751

3 (Score: 16-19) 45.3% 4.88 (4.49, 5.30) <0.001 n=5,620

4 (Score: 20-40) 62.7% 7.98 (7.37, 8.64) <0.001 n=6,644

**Supplemental Figure S1**. Kaplan-Meier survival curves displaying the association of the Summit Risk Score with all-cause mortality among: A) an Intermountain population of lower-risk COPD outpatients with no cardiovascular risk factors, N=8,551 (for quartiles 4, 3, and 2 versus quartile 1: log-rank p<0.001, p<0.001, and p<0.001, respectively; c-statistic: c=0.708), and B) an Intermountain population of higher-risk COPD inpatients, N=26,170 (for quartiles 4, 3, and 2 versus quartile 1: log-rank p<0.001, p<0.001, and p<0.001, respectively; c-statistic: c=0.733).

A)


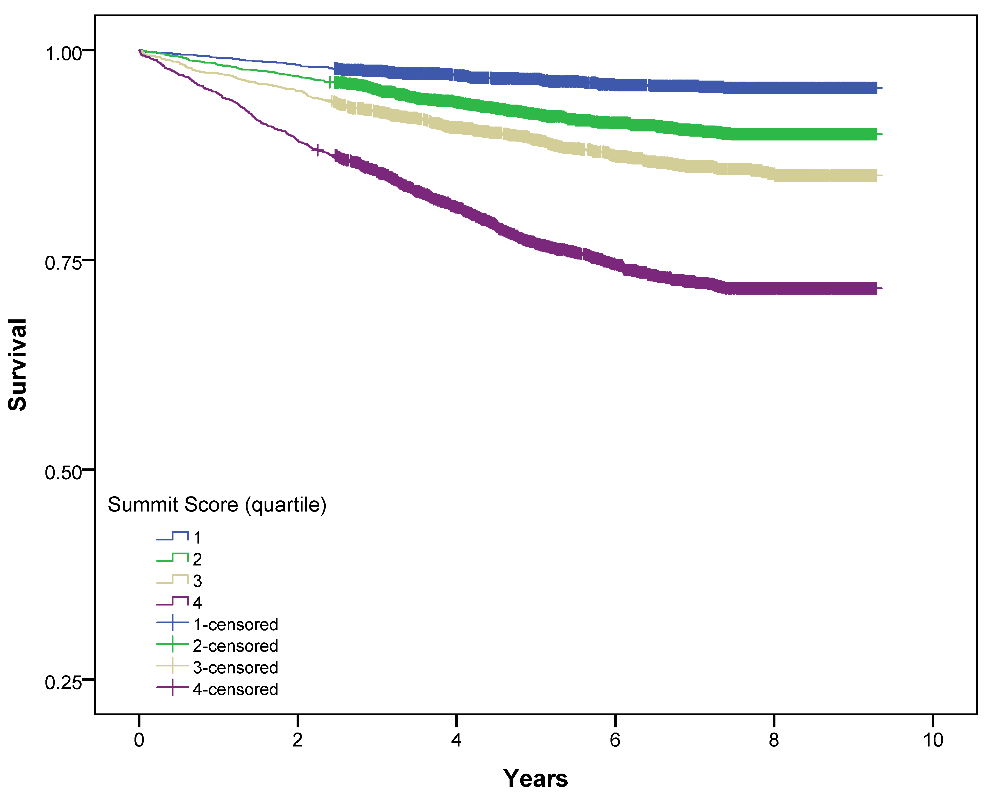


B)


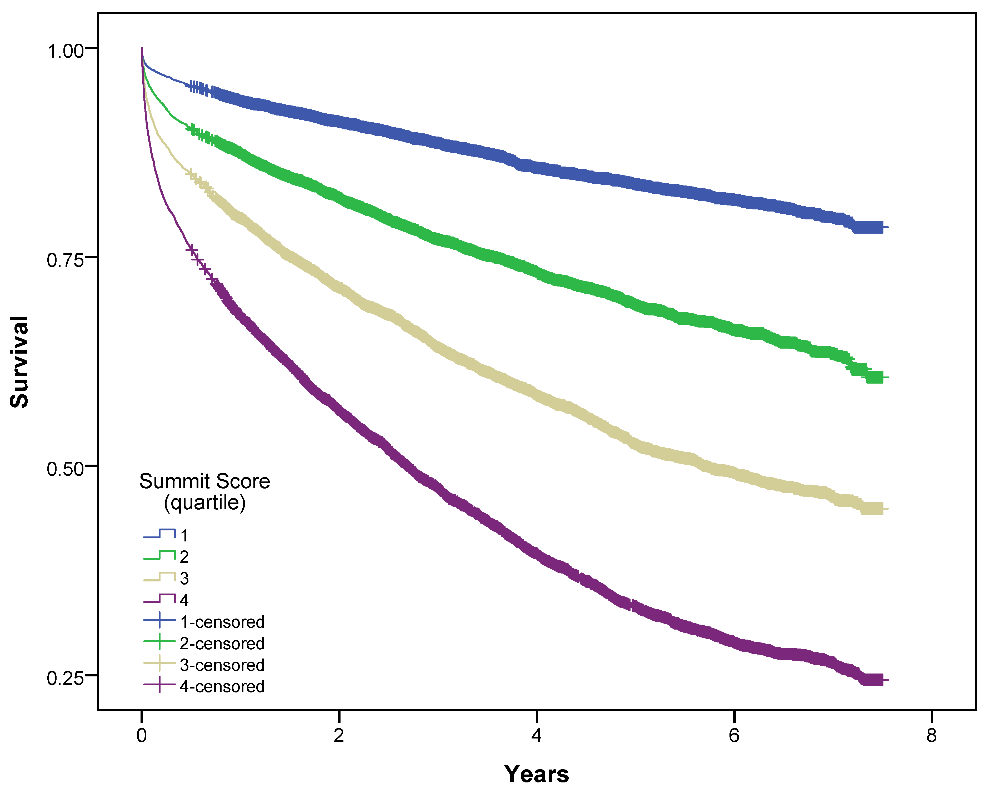


**Supplemental Figure S2**. Association of the Summit Score with all-cause mortality using the SUMMIT population’s quartile thresholds in Intermountain: A) outpatients with cardiovascular risks (p<0.001), B) outpatients with non-cardiovascular, and C) inpatients (p<0.001).

A)


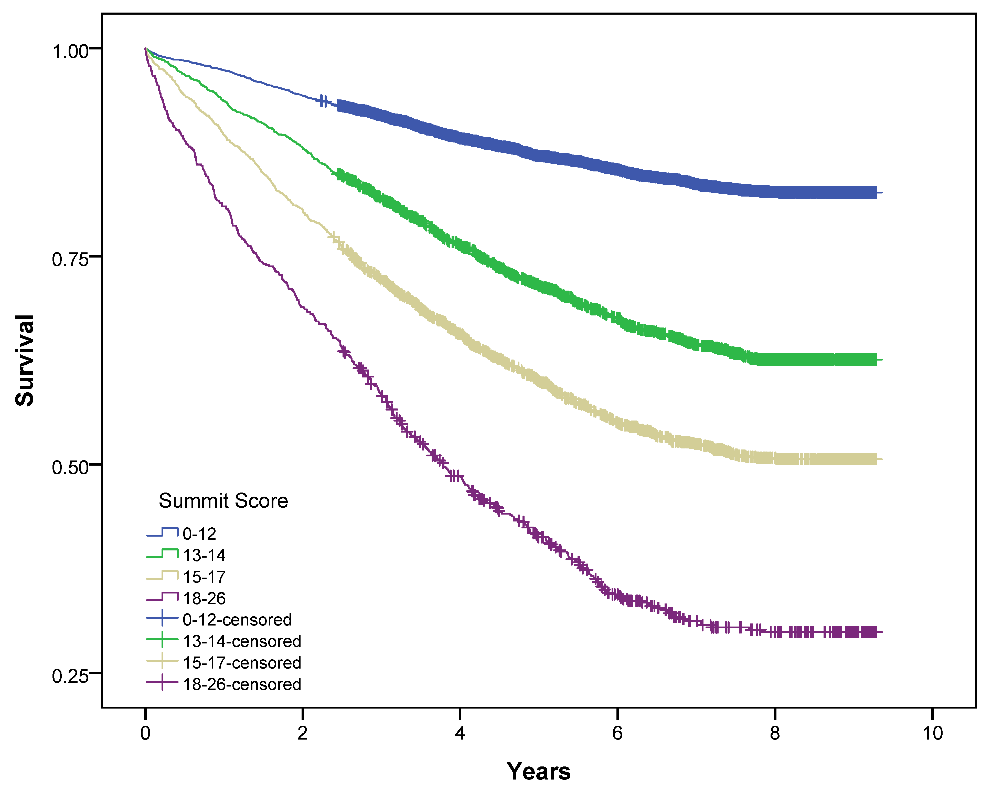


B)


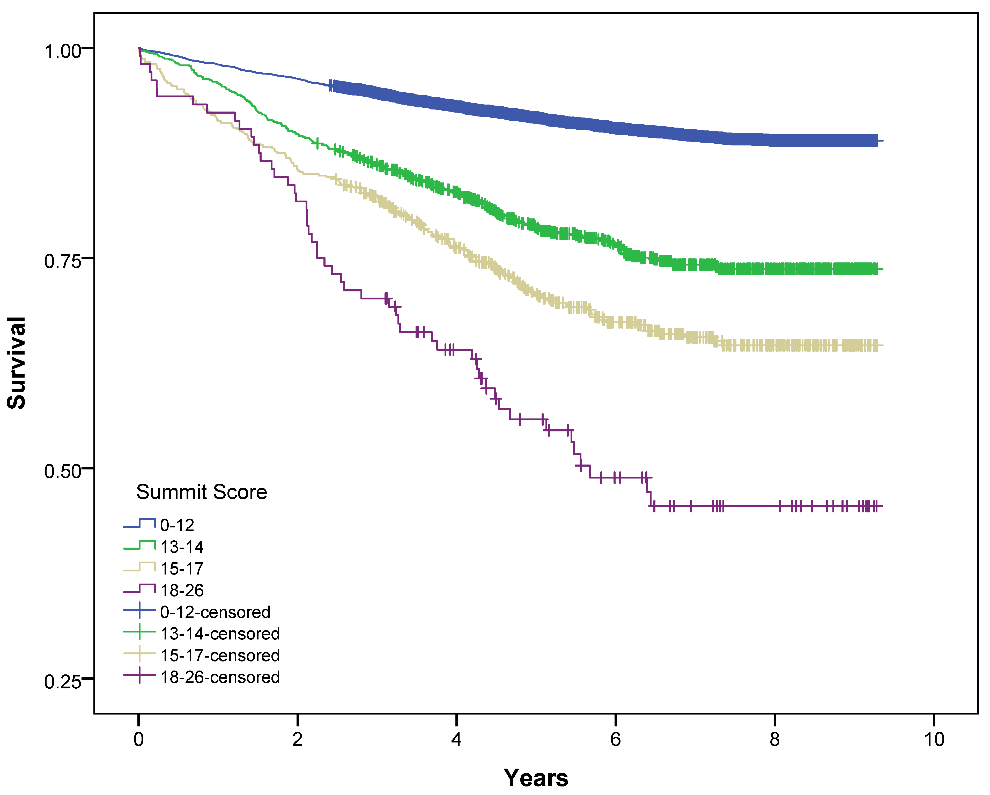


C)

**
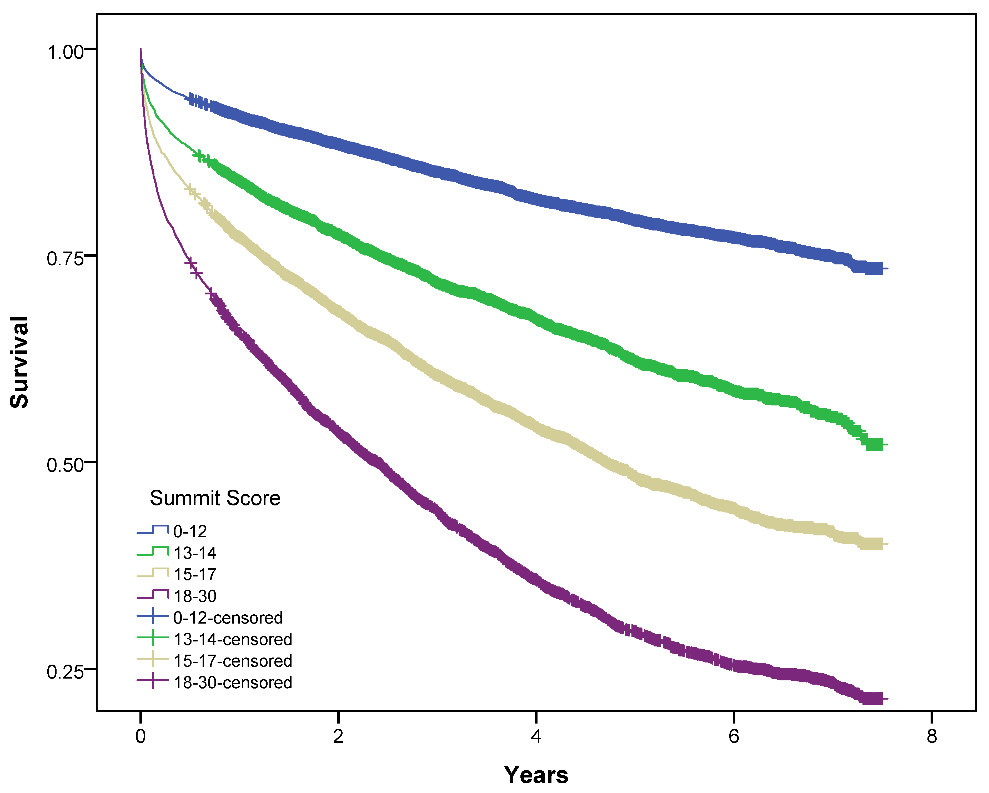
**

**Supplemental Figure S3**. A comparison of the association of SUMMIT trial treatments with all-cause mortality among SUMMIT trial subjects: A) for placebo and FF 100/VI 25 across all individual values of the Summit Score from which the scores 14-19 were chosen as the contiguous set of scores in which any mortality benefit was derived from the combination of FF 100 µg/VI 25 µg (see Figure 2) (also note that only n=202 subjects [1.2%] had Summit Scores ≥24, thus despite the possibility that a benefit may be derived from the combination medication in that subset, the sample size was too low based on study subset identification criteria to attempt such an evaluation), and B) the hazard curves for all-cause mortality of the SUMMIT trial treatments among SUMMIT trial subjects with Summit Score ≤13 (n=5,610, which is 34.0% of the SUMMIT trial subjects) in whom no difference was found between FF 100 µg/VI 25 µg and placebo (HR=1.14, CI=0.73, 1.78; p=0.58) [FF 100 μg/VI 25 μg also was strongly associated in the score ≤13 subjects with lower risk of moderate to severe COPD exacerbation (p<0.001, HR=0.69, CI=0.59, 0.80) and with improved changes in FEV1 and FEV1/FVC ratio (all p<0.001) compared with placebo, but weakly with FVC changes and not with cardiovascular events (p=0.65, HR=1.12, CI=0.70, 1.80)], and C) the hazard curves among subjects with a Summit Score ≥20 (n=1,632, which is 9.9% of the SUMMIT trial subjects) in whom no difference was found between FF 100 µg/VI 25 µg and placebo (HR=1.03, CI=0.73, 1.44; p=0.89) [FF 100 μg/VI 25 μg was associated in the score ≥20 subjects with lower risk of moderate to severe COPD exacerbation (p=0.014, HR=0.75, CI=0.59, 0.94) and with improved changes in FEV1/FVC ratio (all p<0.001) compared with placebo, but weakly with FEV1 changes and not with FVC changes or cardiovascular events (p=0.46, HR=1.20, CI=0.74, 1.95)].

A)


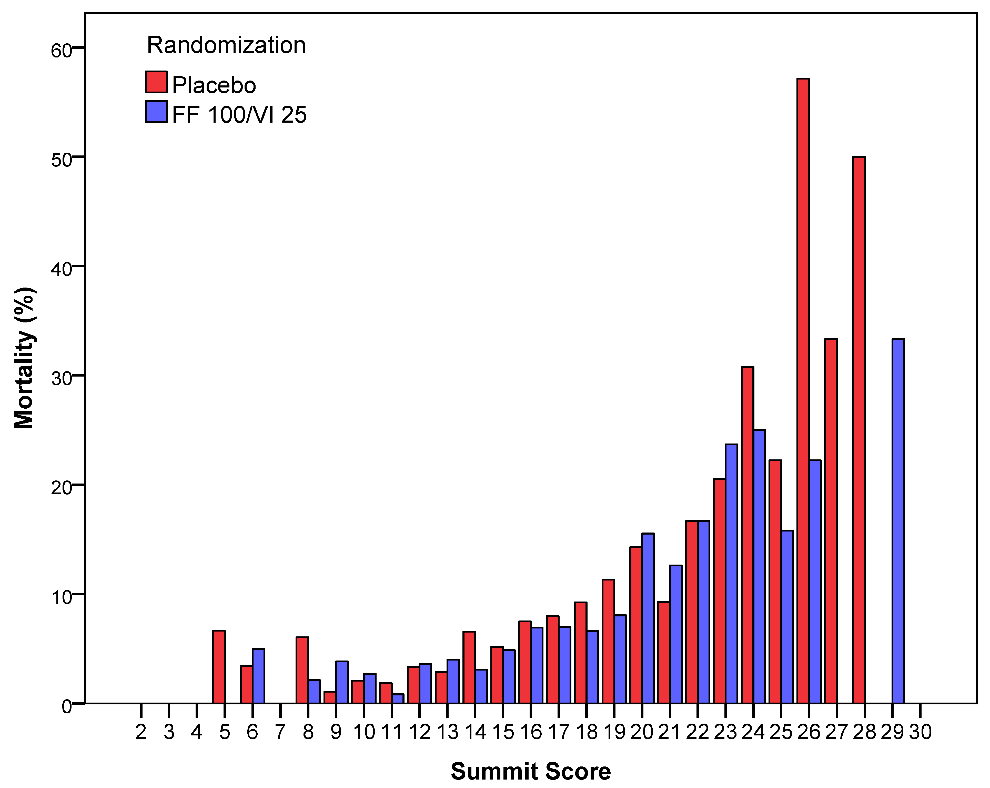


B)

**
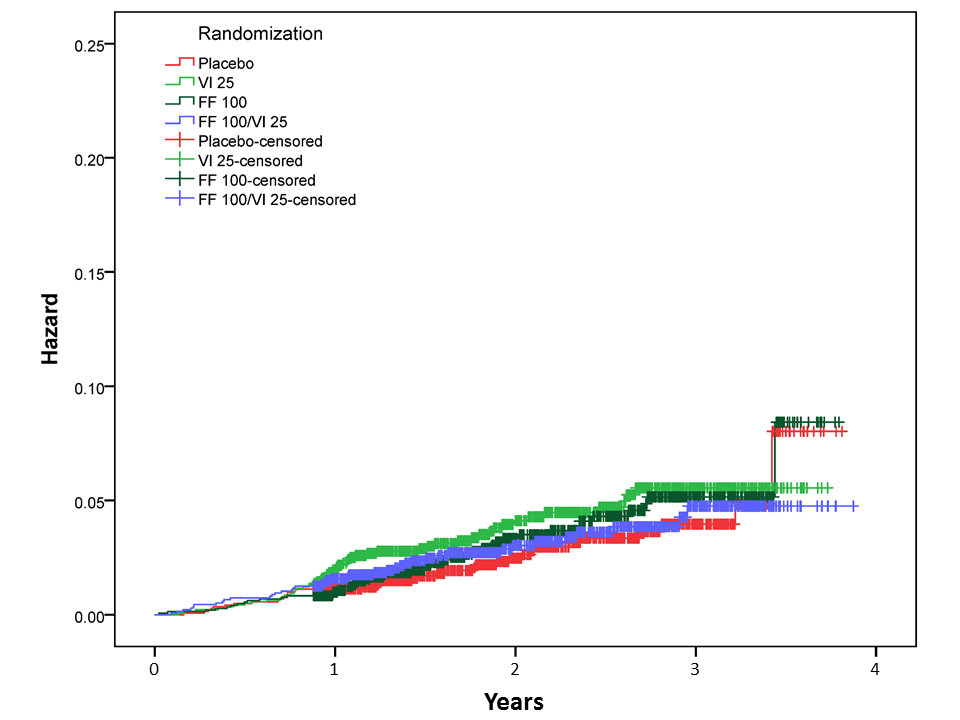
**

C)

**
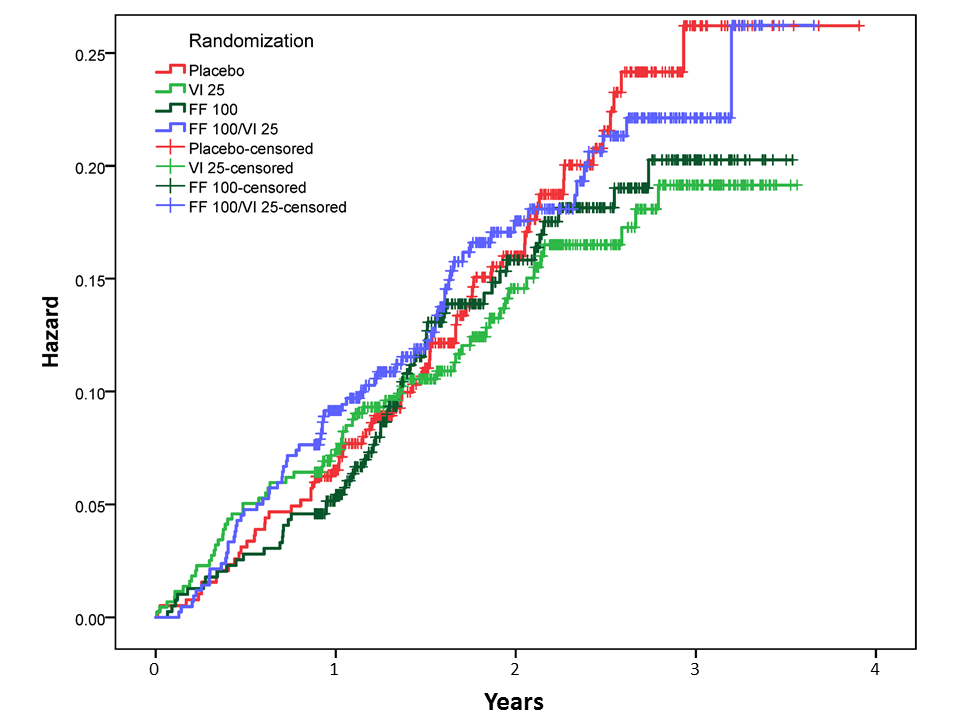
**

**Supplemental Figure S4**. Kaplan-Meier survival curves among SUMMIT trial subjects with complete blood count and basic metabolic profile laboratory panels available, showing the association with all-cause mortality of: A) the Intermountain Mortality Risk Score (IMRS) with 7.5%, 6.2%, 5.8%, and 3.4% mortality in quartiles 4 (28 deaths; n=372), 3 (31 deaths; n=497), 2 (30 deaths; n=518), and 1 (12 deaths, n=358), respectively (log-rank p-trend=0.022),(1) and B) the pulmonary-specific IMRS (pIMRS), for which quartiles 4 (24 deaths; n=359), 3 (24 deaths; n=337), 2 (21 deaths; n=481), and 1 (23 deaths; n=491) had mortality of 6.7%, 7.1%, 4.4%, and 4.7%, respectively (log-rank p-trend=0.037).(2) C-statistics in females and males averaged c=0.557 for IMRS and c=0.561 for pIMRS. Only a subset of the SUMMIT trial population had the data necessary to compute IMRS (N=1,745) and pIMRS (N=1,668).

A)


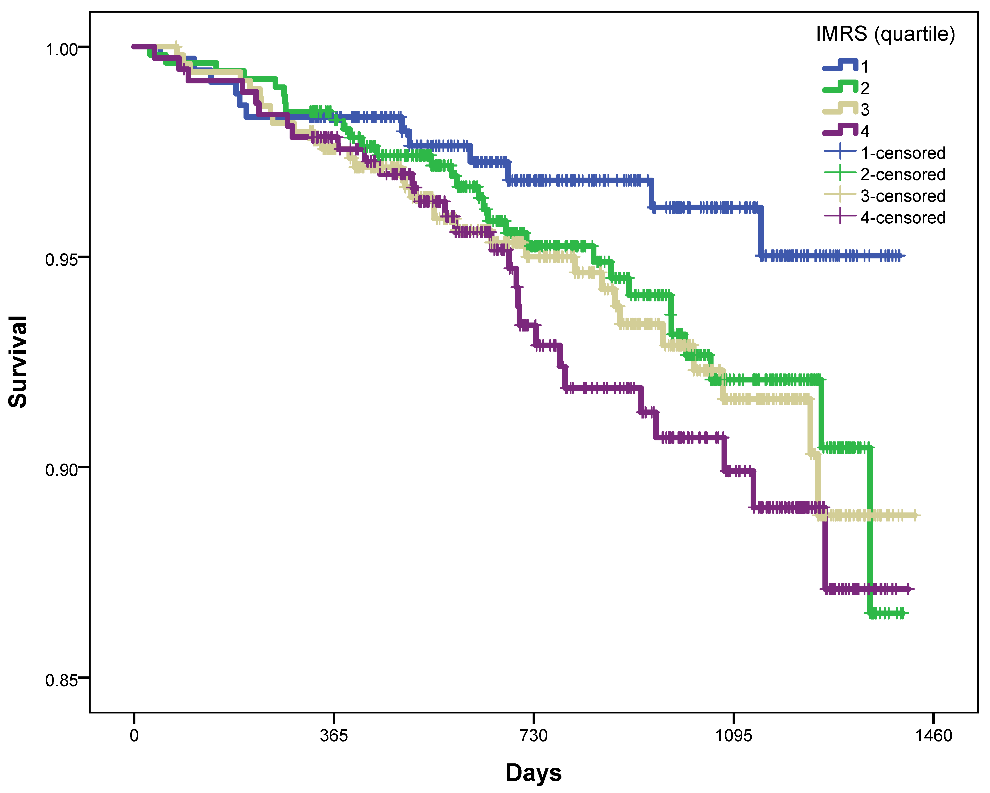


0 1 2 3 4

**Years**

B)


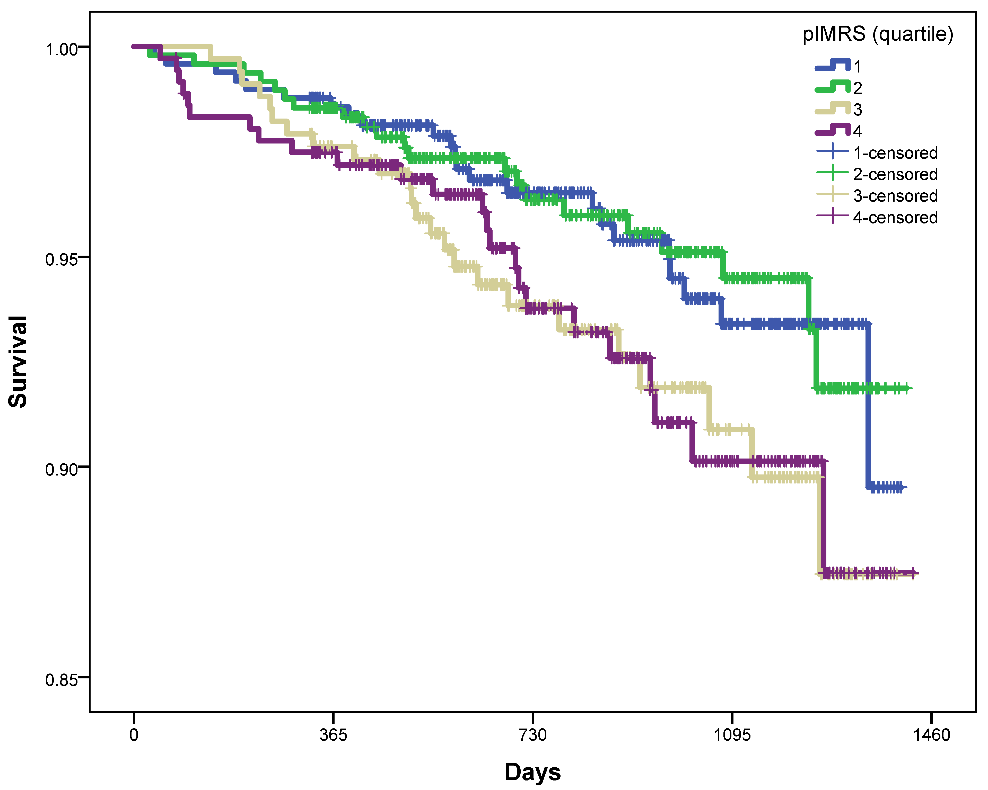


0 1 2 3 4

**Years**

**Supplemental Figure S5**. Kaplan-Meier survival curves displaying the association of the Summit Lab Score with all-cause mortality among: A) the validation half of the SUMMIT trial population, N=8,304 (for quartiles 4, 3, and 2 compared with quartile 1: log-rank p<0.001, p<0.001, and p=0.32, respectively; c-statistic: c=0.638), B) the Intermountain Healthcare COPD outpatients with cardiovascular risks, N=9,251 (for quartiles 4, 3, and 2 compared with quartile 1: log-rank p<0.001, p<0.001, and p<0.001, respectively; c-statistic: c=0.720), C) the Intermountain Healthcare COPD outpatients without cardiovascular risks, N=8,551 (for quartiles 4, 3, and 2 compared with quartile 1: log-rank p<0.001, p<0.001, and p<0.001, respectively; c-statistic: c=0.696), and D) the Intermountain Healthcare COPD inpatients validation population, N=26,170 (for quartiles 4, 3, and 2 compared with quartile 1: log-rank p<0.001, p<0.001, and p<0.001, respectively; c-statistic: c=0.742).

A)


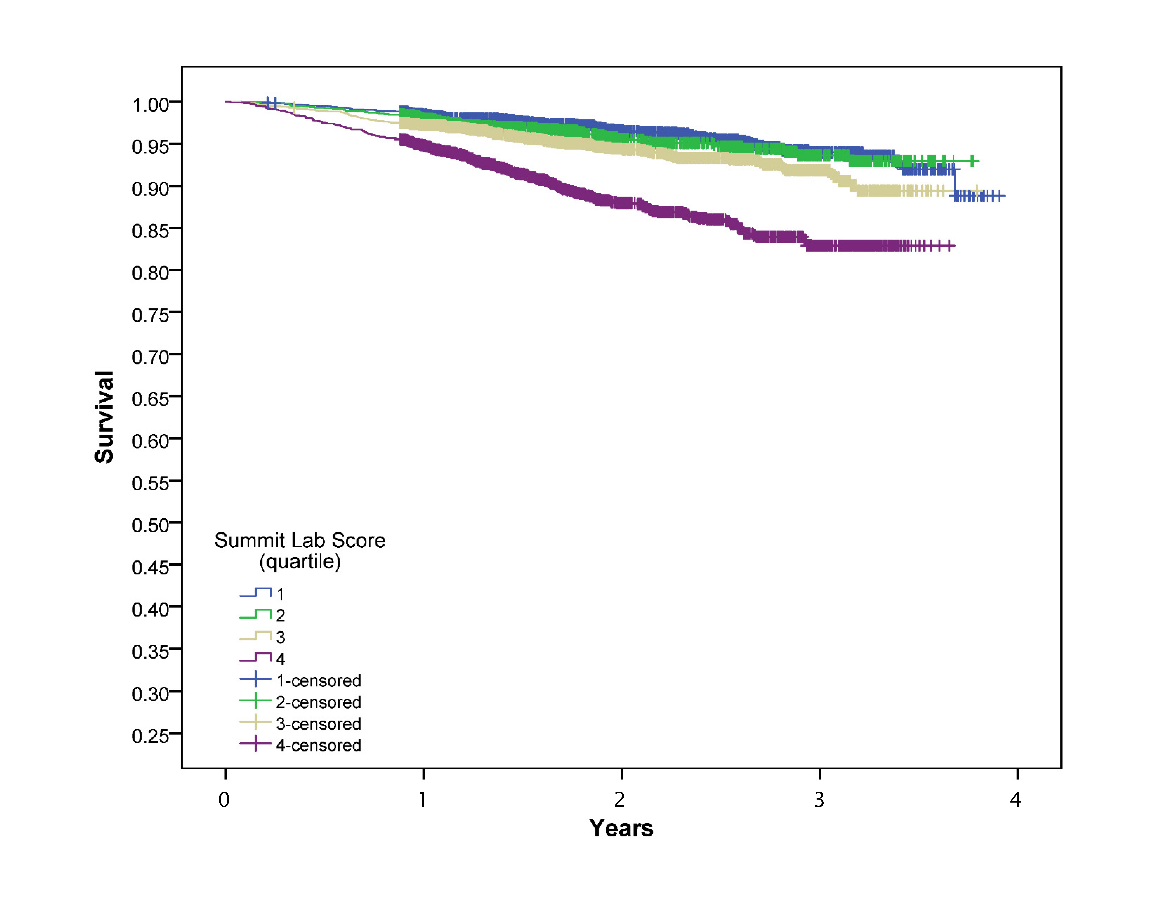


B)


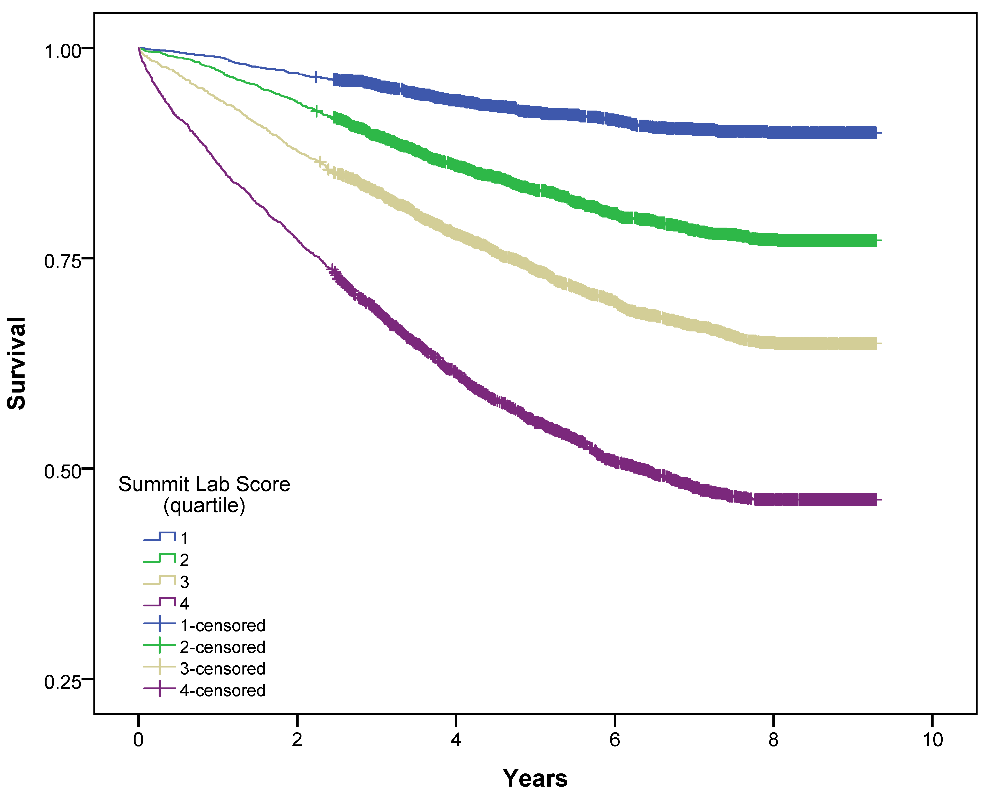


C)


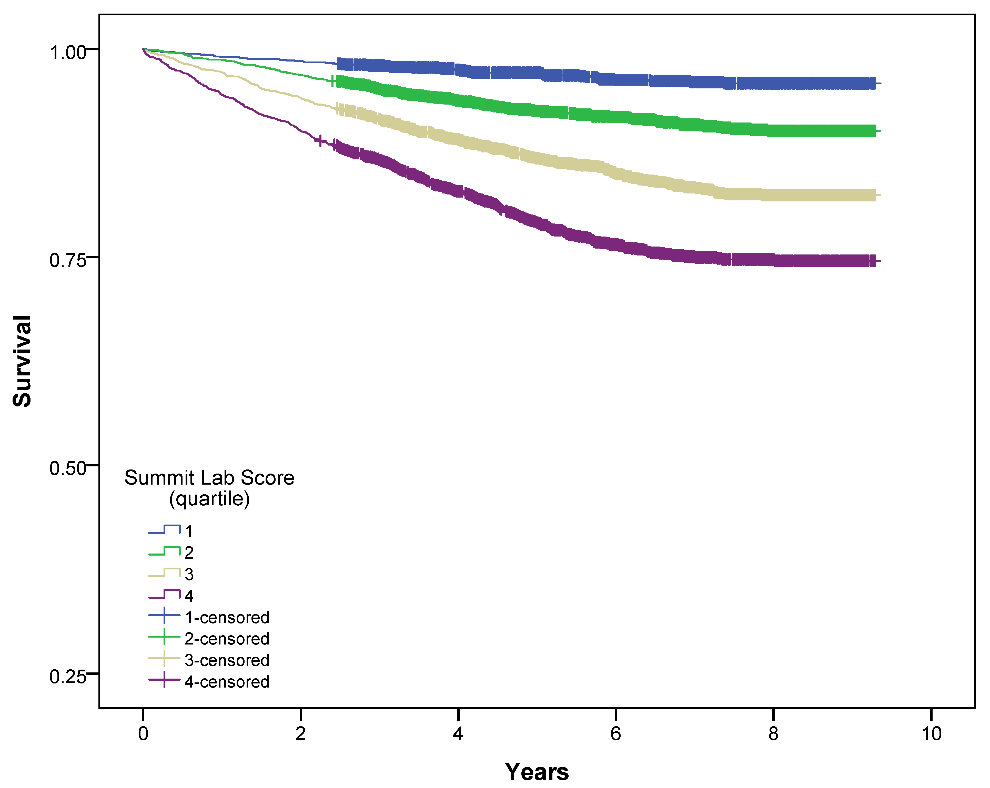


D)


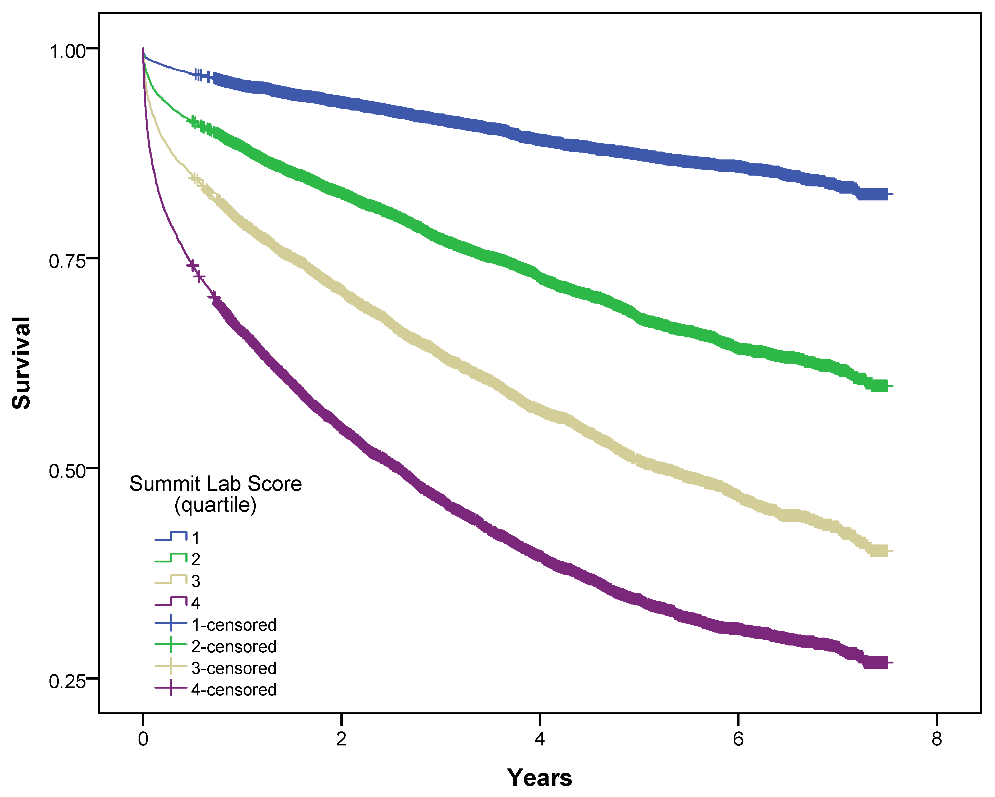

Supplement: Supplementary file 1 [file get_supplementary_file.php]
